# Supplementary material for: Four Cysteine Residues Contribute to Homodimerization of Chicken Interleukin-2
Source: MDPI journal article supplement (doi:10.3390/ijms20225744), 2019-11-15
Supplement: s1 [file Table S1.xlsx]

## Sheet: Sheet1
Table S1. The accession numbers of bird IL-2s in alignment.
Animal	GenBank Accession#
Gallus gallus	CAE17662.1
Anas platyrhynchos	AAV70981.1
Meleagris gallopavo	CAB65230.1
Coturnix japonica	AAR23107.1
Cairina moschata	AAO39413.1
Anas platyrhynchos	AAO20087.1
