# Supplementary material for: Four Cysteine Residues Contribute to Homodimerization of Chicken Interleukin-2
Source: MDPI journal article supplement (doi:10.3390/ijms20225744), 2019-11-15
Supplement: s1 [file Table S2.xlsx]

## Sheet: Sheet1
Table S2. The accession numbers of mammalian IL-2s in alignment.
Animal	GenBank Accession#
Homo sapiens	NP_000577.2
Rattus norvegicus	NP_446288.1
Ovis aries	NP_001009806.1
Bubalus bubalis	NP_001277784.1
Canis lupus familiaris	NP_001003305.1
Bos taurus	NP_851340.2
Sus scrofa	NP_999026.1
Dasypus novemcinctus	NP_001268243.1
Felis catus	NP_001036802.1
Macaca fascicularis	NP_001271628.1
Ailuropoda melanoleuca	NP_001291800.1
Macaca mulatta	NP_001040595.1
Capra hircus	NP_001274496.1
Cavia porcellus	NP_001166308.1
Papio anubis	NP_001106124.1
Mesocricetus auratus	NP_001268558.1
Trichosurus vulpecula	ADV58716.1
Moschus berezovskii	AAW27917.1
Camelus dromedarius	NP_001290477.1
Marmota monax	ABB84516.1
Boselaphus tragocamelus	AAY41281.1
Heterocephalus glaber	EHB17404.1
Hylobates lar	AAA35454.1
Capra falconeri	ABK41606.1
Meriones unguiculatus	CAA48679.1
Equus caballus	CAA49190.1
Microtus ochrogaster	XP_005370447.1
Echinops telfairi	XP_004711899.1
Sorex araneus	XP_004606348.1
Ochotona princeps	XP_004594624.1
Orcinus orca	XP_004265151.1
Cercocebus atys	XP_011937479.1
Mandrillus leucophaeus	XP_011833646.1
Tupaia chinensis	XP_006153185.
Myotis davidii	ELK30926.1
Pteropus alecto	ELK07634.1
Cricetulus griseus	EGW04176.1
Pteropus vampyrus	XP_011373467.1
Loxodonta africana	XP_003410557.1
Saimiri boliviensis boliviensis	XP_003936285.1
Rhinopithecus roxellana	XP_010360811.1
Pan troglodytes	XP_517425.1
Pongo abelii	XP_002815161.1
Callithrix jacchus	XP_002745478.1
Ursus maritimus	XP_008687711.1
Equus przewalskii	XP_008528829.1
Orycteropus afer afer	XP_007944647.1
Lipotes vexillifer	XP_007464893.1
Physeter catodon	XP_007116133.1
Chrysochloris asiatica	XP_006866348.1
Leptonychotes weddellii	XP_006738235.1
Vicugna pacos	XP_006217680.1
Myotis lucifugus	XP_006081721.1
Macaca nemestrin	AAA86714.1
Bison bison	ABO69919.1
Vulpes vulpes	ABO26864.1
